# Supplementary material
Source: ML conference proceedings conference paper supplement (https://proceedings.mlr.press/v130/arora21a.html)
Supplement: Supplementary file 2 [file arora21a-supp.zip]

Archive with 24 entries (23 files):
- Supplementary/
- __MACOSX/._Supplementary
- Supplementary/Corralling_Stochastic_Bandits_full.pdf
- __MACOSX/Supplementary/._Corralling_Stochastic_Bandits_full.pdf
- Supplementary/Tsallis_INF.py
- __MACOSX/Supplementary/._Tsallis_INF.py
- Supplementary/.DS_Store
- __MACOSX/Supplementary/._.DS_Store
- Supplementary/Corralling_LogBar.py
- __MACOSX/Supplementary/._Corralling_LogBar.py
- Supplementary/Corralling_Tsallis12.py
- __MACOSX/Supplementary/._Corralling_Tsallis12.py
- Supplementary/readme
- __MACOSX/Supplementary/._readme
- Supplementary/Corralling_UCB.py
- __MACOSX/Supplementary/._Corralling_UCB.py
- Supplementary/UCB_I.py
- __MACOSX/Supplementary/._UCB_I.py
- Supplementary/Thompson_Sampling.py
- __MACOSX/Supplementary/._Thompson_Sampling.py
- Supplementary/run_experiment.py
- __MACOSX/Supplementary/._run_experiment.py
- Supplementary/Plot_corral_exp.ipynb
- __MACOSX/Supplementary/._Plot_corral_exp.ipynb
